# Supplementary material for: On reactive Ion Etching of Parylene-C with Simple Photoresist Mask for Fabrication of High Porosity Membranes to Capture Circulating and Exfoliated Tumor Cells
Source: MDPI journal article supplement (doi:10.3390/mi15040521), 2024-04-13
Supplement: s1 [file s1]

## Supplementary Materials

### S1. Porosity of close-packed hexagonal-shaped micropore array

A unit cell of the pore array is highlighted in **Fig. S1**. The pore area within the unit is 3x of an individual hexagonal pore. The porosity can be calculated as:

$$Porosity = \frac{3 \cdot A_{pore}}{A_{unit\ cell}} = 3 \cdot \left(\frac{D}{D'}\right)^2 = 3 \cdot \left[\frac{D}{2 \cdot (D+S) \cdot \sin 60^\circ}\right]^2 = \left(\frac{D}{D+S}\right)^2, \quad (S1)$$

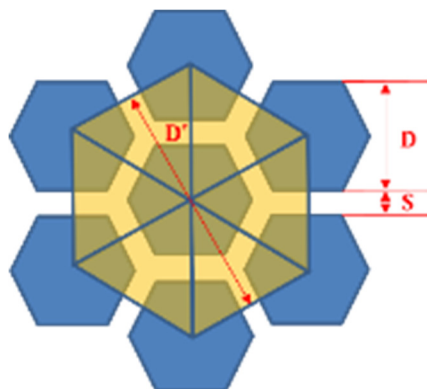

**Figure S1.** Schematic for porosity calculation of close-packed hexagonal-shaped micropore arrays.

**Table S1.** Membrane porosity for different array design.

| S(μm) \ D(μm) | 8     | 10    | 12    | 40    |
|---------------|-------|-------|-------|-------|
| 4             | 44.4% | 51.0% | 56.3% | N/A   |
| 6             | 32.7% | 39.1% | 44.4% | 75.6% |

**Table S1** lists the nominal porosity of the membrane for different array design. The final fabricated membranes had porosity over 40% in general due to lateral etching of the pore-to-pore spacing during fabrication.

## S2. Device and setup for capturing spiked tumor cells

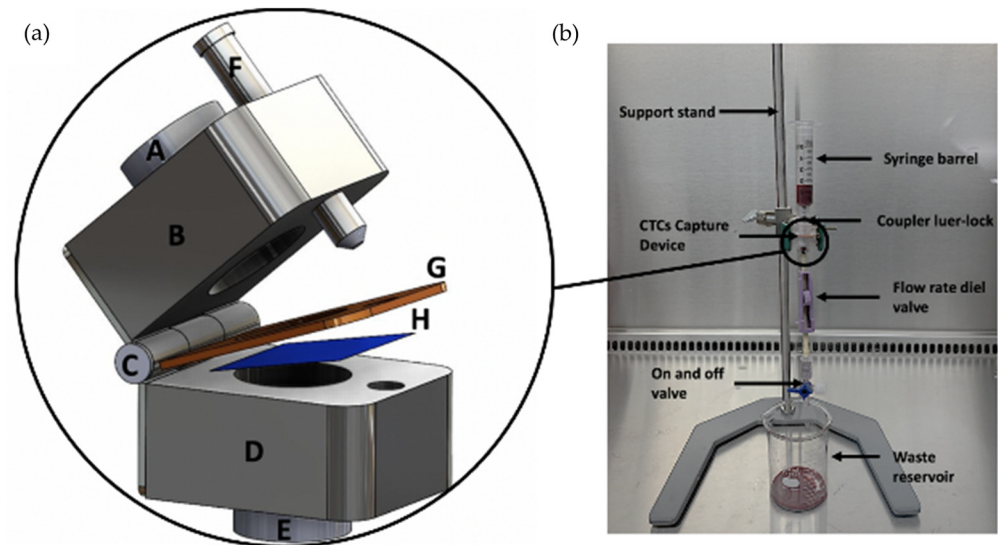

**Figure S2.** Device and setup for capturing spiked tumor cells. (a) Schematic of CTC Capturing Device. A: fluid inlet and reservoir luer-lock attachment, B: upper polycarbonate housing, C: flexible hinge, D: lower polycarbonate housing, E: waste outlet to flow rate control valve, F: device locking rod, G: rubber gasket (silicon 20A), H: parylene microporous membrane. (b) An image of experimental setup for CTC capture with a syringe barrel at the inlet, a flow regulator and shut-off valve at the outlet.

## S3. Viability of captured SJSA-1 cells

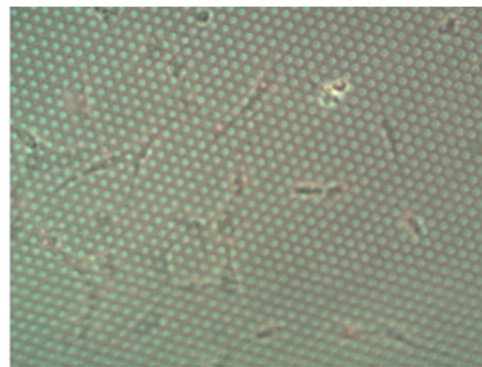

**Figure S3.** Viability of captured SJSA-1 cells: phase-contrast images showing growth of captured SJSA-1 cells on the Parylene-C membrane cultured inside a CO<sub>2</sub> incubator.
